# Supplementary material
Source: PubMed Central journal article supplement (PMC4494832)
Supplement: NIHMS4482-supplement-Suppl__material.pdf [file NIHMS4482-supplement-Suppl__material.pdf]

## SUPPLEMENTARY MATERIAL

**Supplemental Figure S1.** Expanded behavioral model of healthcare utilization framework for analyses: factors associated with HF clinic use

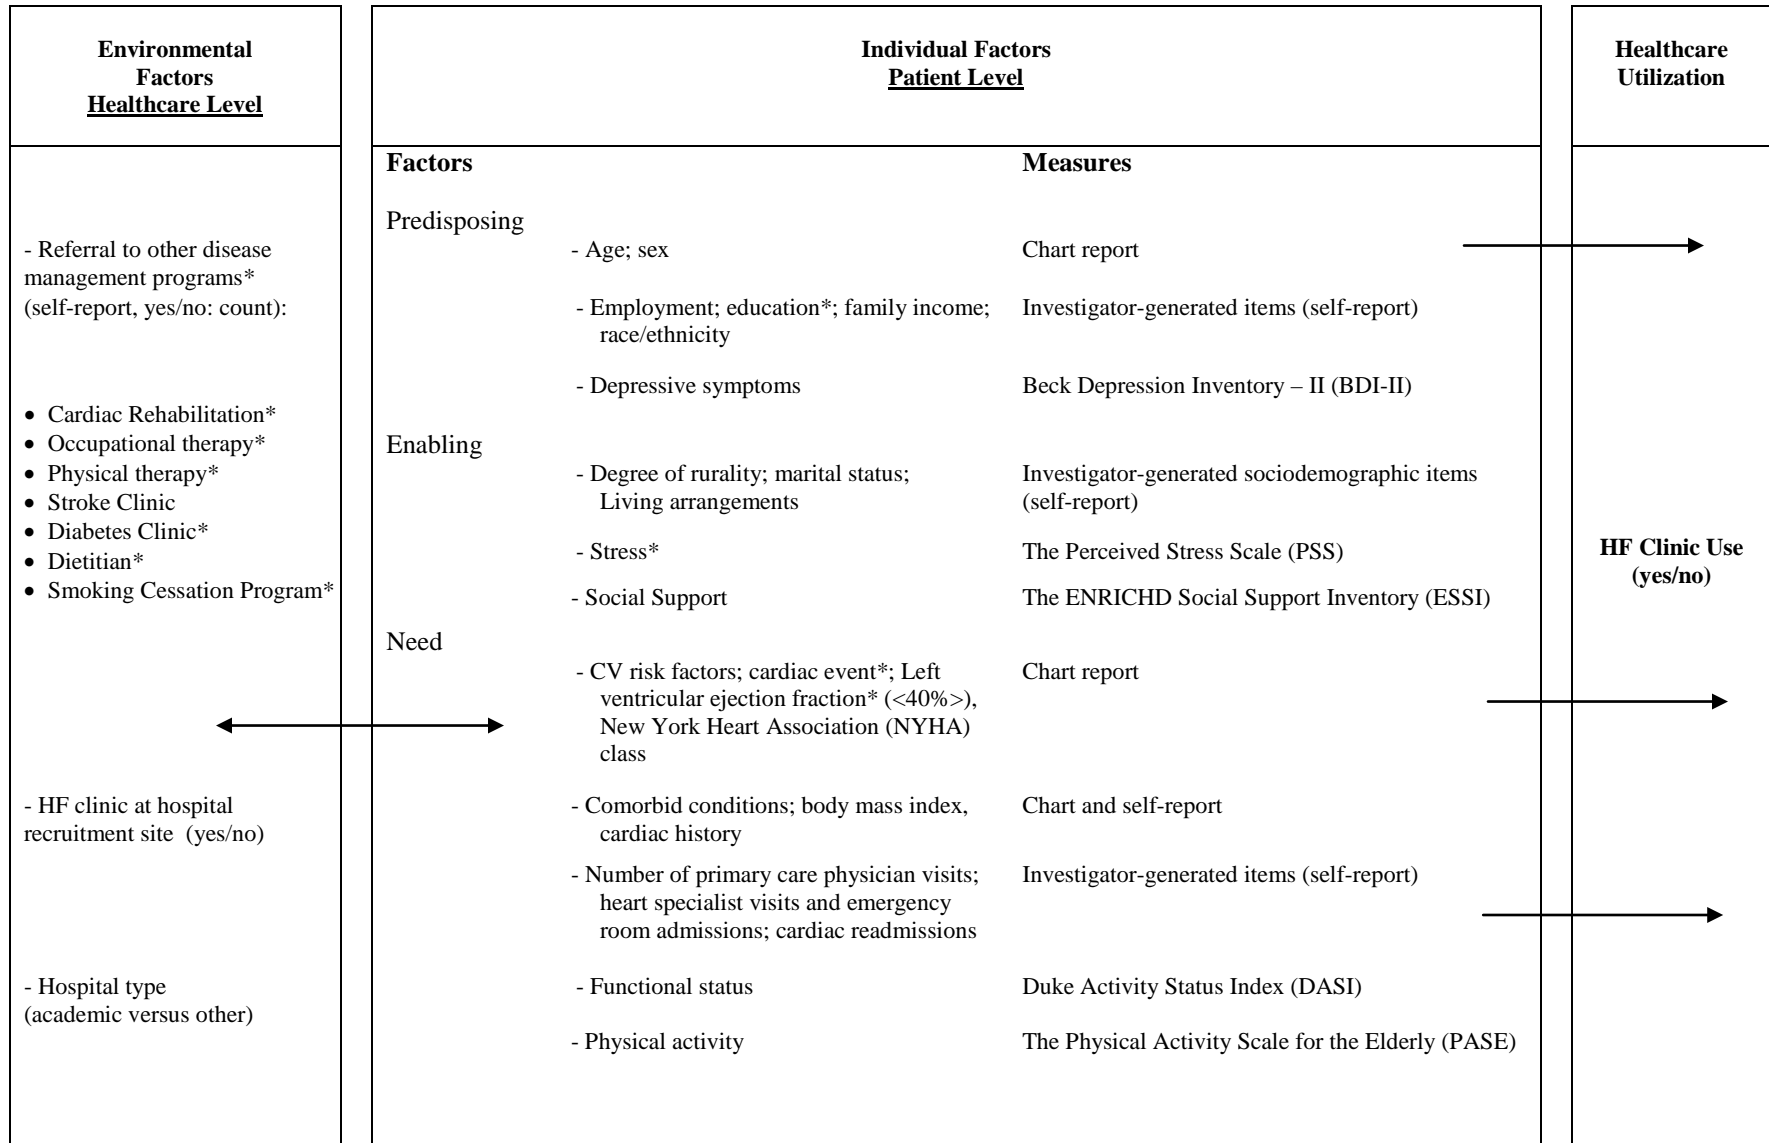

\* $P < 0.1$  at the bivariate level

Supplemental Figure S2. Study Flow Diagram

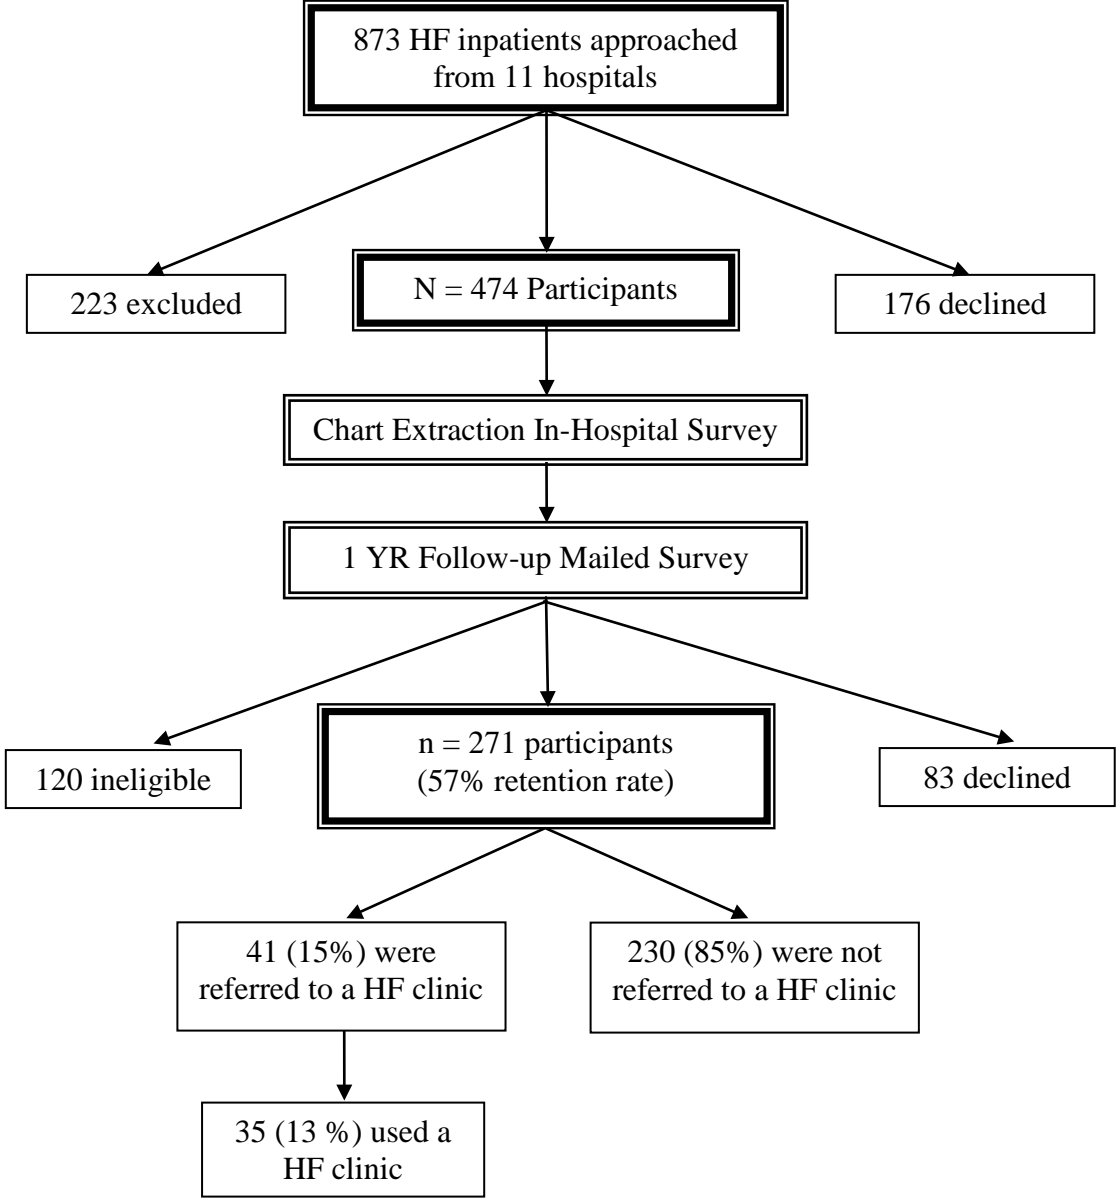

**Supplemental Table S1.** Sociodemographic and clinical characteristics of HF patients by participant status at 1-year post-hospitalization

| Characteristic                           | Retained<br>n=271 | Ineligible<br>n=120 | Declined<br>n=83 | Total<br>N= 474 | <i>P</i> value |
|------------------------------------------|-------------------|---------------------|------------------|-----------------|----------------|
| <b>Sociodemographic</b>                  |                   |                     |                  |                 |                |
| Age, mean yrs (SD)                       | 67.3 (11.5)       | 70.5 (12.1)         | 65.5 (12.9)      | 67.8 (12.0)     | 0.01           |
| Sex, female, n (%)                       | 70 (25.8)         | 45 (37.8)           | 31 (37.3)        | 146 (30.8)      | 0.02           |
| Ethnocultural background, white, n (%)   | 219 (84.9)        | 89 (79.5)           | 57 (72.2)        | 365 (81.3)      | 0.03           |
| Married, n (%)                           | 189 (71.1)        | 68 (57.1)           | 53 (64.6)        | 310 (66.4)      | 0.03           |
| Education, completed high school, n (%)  | 187 (71.1)        | 66 (57.4)           | 55 (68.8)        | 308 (67.2)      | 0.03           |
| Work Status, retired, n (%)              | 147 (56.5)        | 76 (67.9)           | 38 (48.7)        | 261 (58.0)      | 0.02           |
| Family income, < \$50,000CAD, n (%)      | 128 (60.1)        | 61 (67.8)           | 36 (64.3)        | 225 (62.7)      | 0.43           |
| Rural living, n (%)                      | 49 (18.1)         | 37 (30.8)           | 21 (25.3)        | 107 (22.6)      | 0.02           |
| <b>Clinical</b>                          |                   |                     |                  |                 |                |
| Index Cardiac condition/procedure, n (%) |                   |                     |                  |                 |                |
| MI                                       | 78 (29.1)         | 45 (37.8)           | 31 (37.8)        | 154 (32.8)      | 0.14           |
| PCI                                      | 56 (20.8)         | 13 (10.9)           | 16 (19.5)        | 85 (18.1)       | 0.06           |
| CABG                                     | 88 (32.7)         | 24 (20.2)           | 23 (28.0)        | 135 (28.7)      | 0.04           |
| Arrhythmia                               | 63 (23.4)         | 23 (19.3)           | 20 (24.4)        | 106 (22.6)      | 0.61           |
| Valve repair/replacement                 | 39 (14.6)         | 8 (6.8)             | 5 (6.1)          | 52 (11.1)       | 0.02           |
| Diabetes, n (%)                          | 98 (36.7)         | 52 (43.7)           | 40 (48.8)        | 190 (40.6)      | 0.11           |
| LVEF < 40%                               | 103 (56.0)        | 37 (52.9)           | 32 (52.5)        | 172 (54.6)      | 0.84           |
| NYHA class III-IV                        | 71 (67.0)         | 21 (77.8)           | 16 (64.0)        | 108 (68.4)      | 0.50           |

|                                     |             |             |             |             |        |
|-------------------------------------|-------------|-------------|-------------|-------------|--------|
| BMI, mean (SD)                      | 28.3 (6.6)  | 27.9 (6.4)  | 28.3 (6.2)  | 28.3 (6.5)  | 0.60   |
| Hypertension, n (%)                 | 187 (75.1)  | 85 (77.3)   | 63 (79.7)   | 335 (76.5)  | 0.68   |
| Dyslipidemia, n (%)                 | 166 (75.5)  | 69 (79.3)   | 58 (86.6)   | 293 (78.3)  | 0.15   |
| Smoker, current, n (%)              | 25 (9.6)    | 4 (3.5)     | 10 (12.8)   | 39 (8.6)    | 0.05   |
| Depression (BDI-II), mean (SD)      | 10.7 (8.6)  | 14.9 (9.8)  | 12.4 (8.5)  | 12.0 ± 9.0  | <0.001 |
| Functional Status (DASI), mean (SD) | 23.5 ± 14.8 | 15.6 ± 13.2 | 18.6 ± 14.2 | 20.6 ± 14.7 | <0.001 |

Percentages take into account missing data for some variables. BMI, body mass index; CABG, coronary artery bypass graft; MI, myocardial infarction; LVEF, left ventricular ejection fraction; NYHA, New York Heart Association; PCI, percutaneous coronary intervention; DASI, Duke Activity Status Index; BDI, Beck Depression Inventory.
